# Supplementary material for: Symbiotic incompatibility between soybean and Bradyrhizobium arises from one amino acid determinant in soybean Rj2 protein
Source: PubMed Central journal article supplement (PMC6743760; doi:10.1371/journal.pone.0222469), 2019-09-13
Supplement: pone.0222469.s001.pdf [file pone.0222469.s001.pdf]

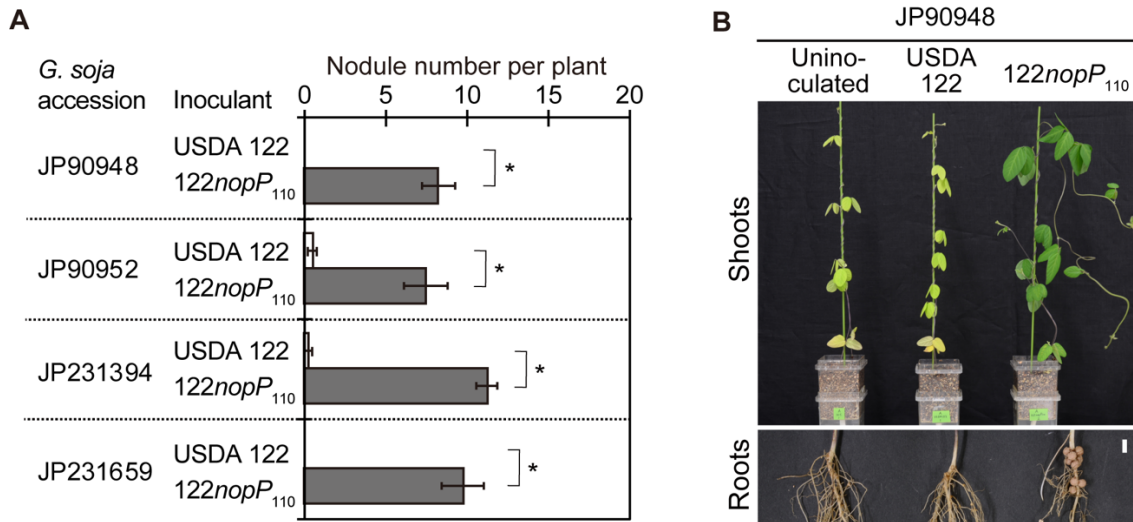

**S1 Fig. Nodulation phenotype of *Glycine soja* accessions following inoculation with *Bradyrhizobium diazoefficiens* USDA 122 and its derivative carrying USDA 110-type *nopP* (122*nopP*<sub>110</sub>).** (A) Number of nodules formed on roots of *Rj2*-genotype of *G. soja* accessions inoculated with *B. diazoefficiens* USDA 122 or 122*nopP*<sub>110</sub> 28 days after inoculation. Error bars show SEM ( $n = 4$ ). Significant differences from 122*nopP*<sub>110</sub> were detected using Student's *t*-test:  $*P < 0.01$ . (B) Shoots and roots of accessions JP90948 (*Rj2*) at 28 days after inoculation with *B. diazoefficiens* strains. Scale bar: 0.5 mm.
